# Supplementary material
Source: PubMed Central journal article supplement (PMC5661292)
Supplement: ASN.2017020142SupplementaryData.pdf [file ASN.2017020142SupplementaryData.pdf]

## Supplementary Figure 1. Flow chart of enrollment of the study participants

### Test set (pediatric cohort )

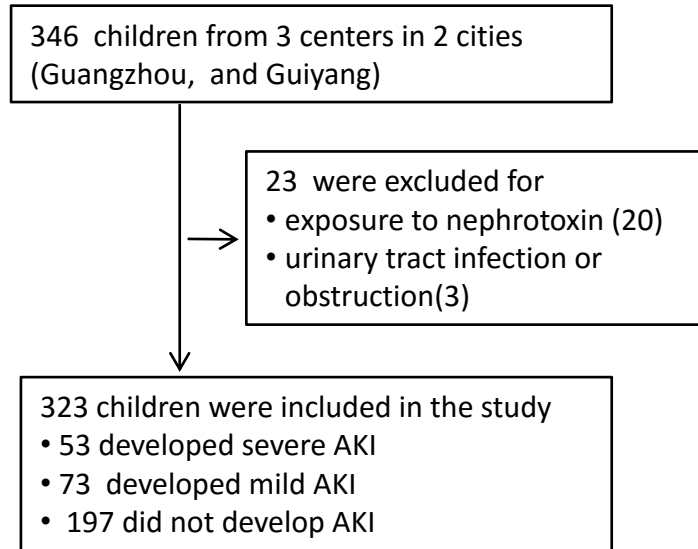

### Validation set (adult cohort )

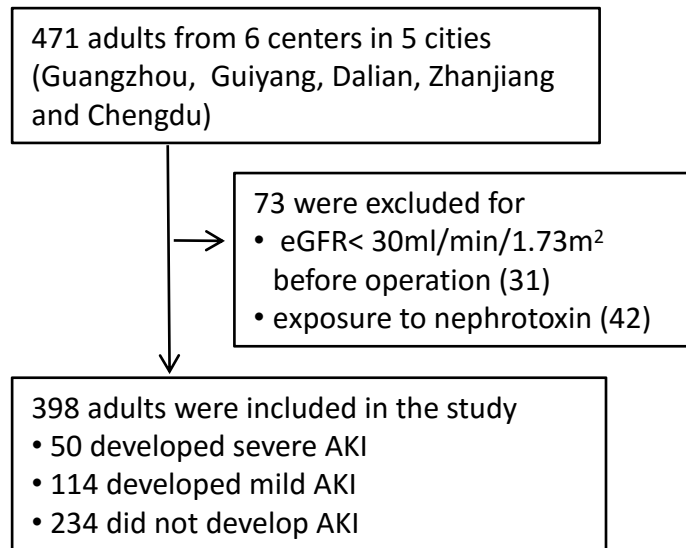

**Supplementary Figure 2.** uMMP-7 levels pre- and post- cardiac surgery in adult patients with or without preexisting CKD

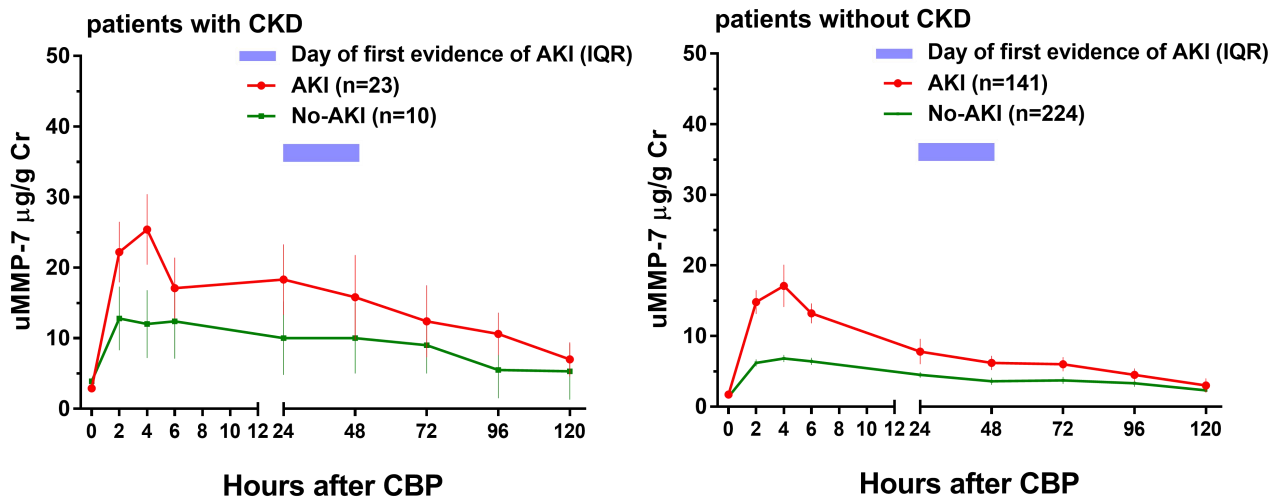

**Supplementary Figure 3.** Plasma MMP-7 levels pre- and post- cardiac surgery in pediatric and adult patients

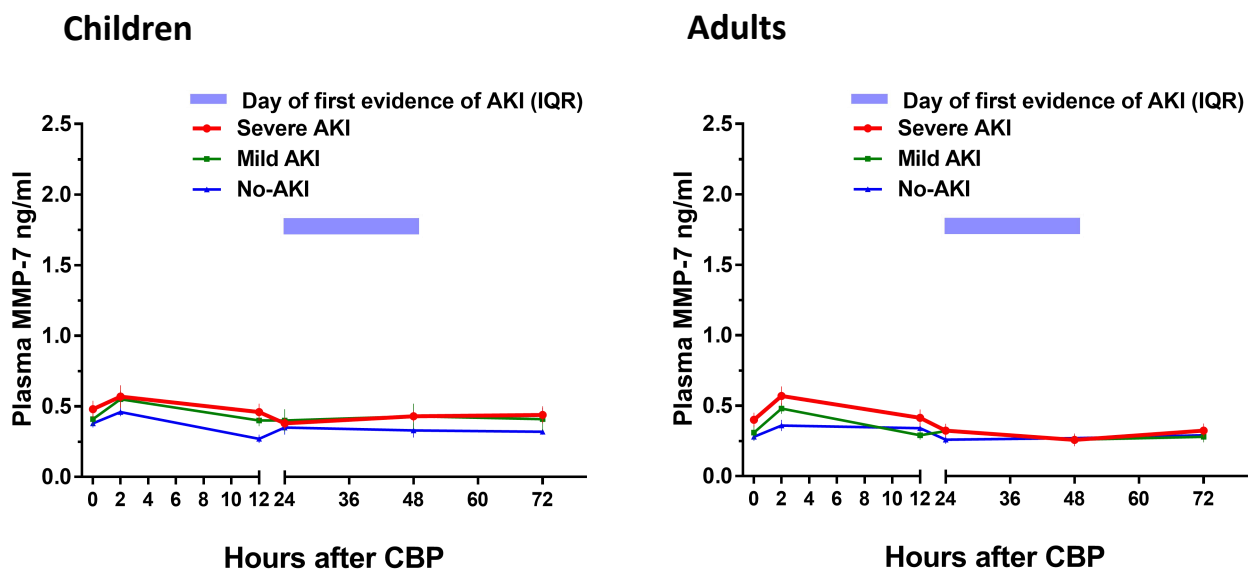

**Supplementary Figure 4. ROC analyses of uMMP-7 and other urinary biomarkers for predicting AKI**

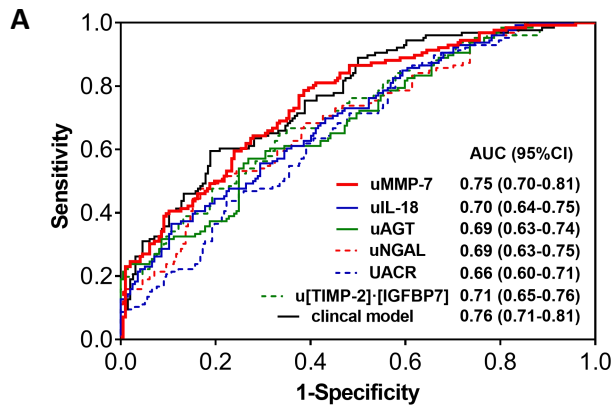

**Predicting AKI in children after cardiac surgery**

| Marker                                     | Best cutoff | Sensitivity | Specificity |
|--------------------------------------------|-------------|-------------|-------------|
| uMMP-7, $\mu\text{g/g Cr}$                 | 6.3         | 0.81        | 0.59        |
| uIL-18, $\text{ng/g Cr}$                   | 794         | 0.79        | 0.45        |
| uAGT, $\mu\text{g/g Cr}$                   | 588         | 0.79        | 0.45        |
| uNGAL, $\mu\text{g/g Cr}$                  | 125         | 0.79        | 0.42        |
| UACR, $\text{mg/g Cr}$                     | 126         | 0.79        | 0.43        |
| u[TIMP-2]:[IGFBP7], $(\mu\text{g/g Cr})^2$ | 21601       | 0.79        | 0.46        |

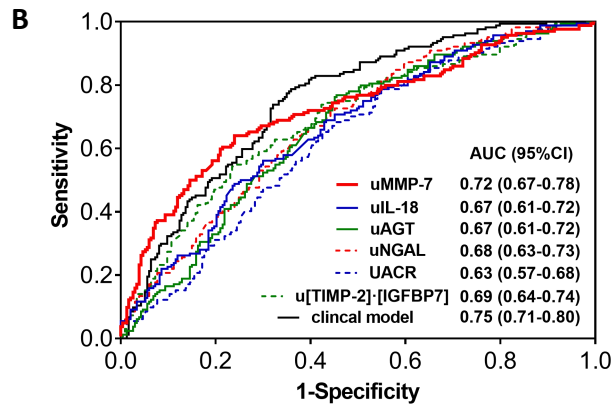

**Predicting AKI in adults after cardiac surgery**

| Marker                                     | Best cutoff | Sensitivity | Specificity |
|--------------------------------------------|-------------|-------------|-------------|
| uMMP-7, $\mu\text{g/g Cr}$                 | 4.7         | 0.79        | 0.45        |
| uIL-18, $\text{ng/g Cr}$                   | 316         | 0.78        | 0.44        |
| uAGT, $\mu\text{g/g Cr}$                   | 339         | 0.78        | 0.43        |
| uNGAL, $\mu\text{g/g Cr}$                  | 63          | 0.77        | 0.50        |
| UACR, $\text{mg/g Cr}$                     | 50          | 0.77        | 0.44        |
| u[TIMP-2]:[IGFBP7], $(\mu\text{g/g Cr})^2$ | 2448        | 0.78        | 0.48        |

**Supplementary Figure 5. ROC analyses of uMMP-7 and other urinary biomarkers for predicting severe AKI at the best timepoint within the first 6 hours in children (A) and adults (B)**

**A**

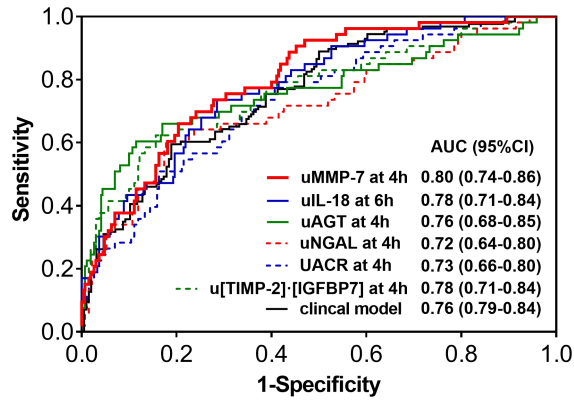

**B**

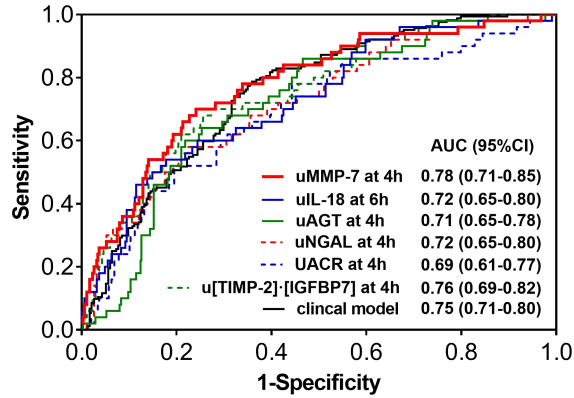

**Supplementary Table 1. Multivariate logistic regression analyses of uMMP-7 for predicting AKI (KDIGO stage 1 to 3) after cardiac surgery <sup>a</sup>**

| uMMP-7 (µg/g Cr)         | AKI <sup>b</sup><br>(%) | Unadjusted OR<br>(95%CI) | P for<br>trend | Adjusted OR <sup>c</sup><br>(95%CI) | P for<br>trend |
|--------------------------|-------------------------|--------------------------|----------------|-------------------------------------|----------------|
| Pediatric cohort (n=323) |                         |                          |                |                                     |                |
| Quintile 1 (<3.6)        | 14.1                    | 1.0 (referent)           | <0.001         | 1.0 (referent)                      | <0.001         |
| Quintile 2 (3.6-6.6)     | 22.1                    | 1.7 (0.7-4.3)            |                | 2.0 (0.7-5.7)                       |                |
| Quintile 3 (6.7-11.6)    | 40.3                    | 4.1 (1.7-9.8)            |                | 2.9 (1.1-8.4)                       |                |
| Quintile 4 (11.7-22.6)   | 48.5                    | 5.7 (2.4-13.5)           |                | 8.0 (2.7-23.9)                      |                |
| Quintile 5 (>22.6)       | 71.4                    | 15.3 (6.3-37.3)          |                | 32.2 (9.5-108.8)                    |                |
| Adult cohort (n=398)     |                         |                          |                |                                     |                |
| Quintile 1 (<3.2)        | 22.8                    | 1.0 (referent)           | <0.001         | 1.0 (referent)                      | <0.001         |
| Quintile 2 (3.2-5.2)     | 26.3                    | 1.2 (0.6-2.5)            |                | 1.0 (0.4-2.1)                       |                |
| Quintile 3 (5.3-7.7)     | 28.8                    | 1.4 (0.7-2.8)            |                | 1.1 (0.5-2.4)                       |                |
| Quintile 4 (7.8-15.2)    | 51.3                    | 3.6 (1.8-7.1)            |                | 2.6 (1.2-5.7)                       |                |
| Quintile 5 (>15.2)       | 77.2                    | 11.4 (5.5-24.1)          |                | 7.7 (3.2-18.3)                      |                |

<sup>a</sup> uMMP-7 expressed as the mean levels within the first 6 hours after CBP.

<sup>b</sup> AKI is defined as an increase in the serum creatinine level to  $\geq 0.3$  mg/dl within 48 hours or  $\geq 50\%$  in 7 days.<sup>1</sup>

<sup>c</sup> In children, adjusted for age, preoperative eGFR, preoperative UACR, RACHS-1  $\geq 3$ , CPB time >120min and sites;<sup>2</sup> in adults, adjusted for age, gender, diabetes, hypertension, preoperative eGFR, preoperative UACR, preoperative serum albumin, CPB time >120min and sites.<sup>3</sup>

**Abbreviations:** uMMP-7, urinary matrix metalloproteinase-7; OR, odds ratio, CI, confidence interval.

## REFERENCES

1. Kidney Disease Improving Global Outcomes (KDIGO) Acute Kidney Injury Work Group: KDIGO clinical practice guideline for acute kidney injury. *Kidney Int Suppl* 2: 1–138, 2012
2. Parikh CR, Devarajan P, Zappitelli M, Sint K, Thiessen-Philbrook H, Li S, Kim RW, Koyner JL, Coca SG, Edelstein CL, Shlipak MG, Garg AX, Krawczeski CD: Postoperative biomarkers predict acute kidney injury and poor outcomes after pediatric cardiac surgery. *J Am Soc Nephrol* 22: 1737-1747, 2011
3. Parikh CR, Coca SG, Thiessen-Philbrook H, Shlipak MG, Koyner JL, Wang Z, Edelstein CL, Devarajan P, Patel UD, Zappitelli M, Krawczeski CD, Passik CS, Swaminathan M, Garg AX: Postoperative biomarkers predict acute kidney injury and poor outcomes after adult cardiac surgery. *J Am Soc Nephrol* 22: 1748-1757, 2011

**Supplementary Table 2. AUC and other variables in adult patients with or without preexisting CKD**

| Variables                                           | eGFR before operation (ml/min/1.73m <sup>2</sup> ) |                  | P      |
|-----------------------------------------------------|----------------------------------------------------|------------------|--------|
|                                                     | 30-59 (n=33)                                       | ≥60 (n=365)      |        |
| Age, year                                           | 57.2±10.8                                          | 45.2±15.1        | <0.001 |
| Male, n (%)                                         | 24 (72.7)                                          | 146 (40.0)       | <0.001 |
| <b>Preexisting clinical conditions</b>              |                                                    |                  |        |
| Diabetes, n (%)                                     | 6 (18.2)                                           | 14 (3.8)         | <0.001 |
| Hypertension, n (%)                                 | 13 (39.4)                                          | 56 (15.3)        | <0.001 |
| <b>Preoperative characteristics</b>                 |                                                    |                  |        |
| eGFR, ml/min per 1.73 m <sup>2</sup> <sup>a</sup>   | 50.3±8.5                                           | 97.5±20.5        | <0.001 |
| UACR, mg/g Cr                                       | 56 (12-119)                                        | 13 (6-36)        | <0.001 |
| Serum creatinine, μmol/L                            | 130.8±31.7                                         | 71.6±16.1        | <0.001 |
| Serum albumin, g/L                                  | 35.3±4.8                                           | 38.9±5.2         | <0.001 |
| <b>Prediction severe AKI <sup>b</sup> by uMMP-7</b> |                                                    |                  |        |
| AUC (95%CI)                                         | 0.72 (0.54-0.90)                                   | 0.77 (0.69-0.85) |        |
| Best cutoff (μg/g Cr)                               | 16.9                                               | 7.6              |        |
| Sensitivity                                         | 0.64                                               | 0.78             |        |
| Specificity                                         | 0.84                                               | 0.66             |        |

<sup>a</sup> eGFR was determined by the Chronic Kidney Disease Epidemiology Collaboration equation (2009).

<sup>b</sup> Severe AKI was defined as an increase in serum creatinine level to ≥2.0 times baseline or acute dialysis.

**Supplementary Table 3. Mean levels of uMMP-7 within the first 6h post CBP in patients who left the hospital with or without resolution of AKI**

|                                                         | Renal function at discharge in survivors |                    |
|---------------------------------------------------------|------------------------------------------|--------------------|
|                                                         | AKI recovered                            | AKI unrecovered    |
| <b>Children</b>                                         |                                          |                    |
| Patients number                                         | 102                                      | 17                 |
| Hospital stay, day                                      | 18 (13-24)                               | 19 (8-34)          |
| Serum creatinine at discharge, $\mu\text{mol/L}$        | 25.2 $\pm$ 24.7                          | 35.5 $\pm$ 16.6    |
| uMMP-7 within the first 6h post CBP, $\mu\text{g/g Cr}$ | 13.4 (6.6-24.0)                          | 22.0 (9.3-48.1)    |
| <b>Adults</b>                                           |                                          |                    |
| Patients number                                         | 136                                      | 23                 |
| Hospital stay, day                                      | 25 (19-34)                               | 23 (18-34)         |
| Serum creatinine at discharge, $\mu\text{mol/L}$        | 77.1 $\pm$ 22.3                          | 189.5.1 $\pm$ 60.8 |
| uMMP-7 within the first 6h post CBP, $\mu\text{g/g Cr}$ | 9.7(4.7-18.7)                            | 17.7 (12.4-33.0)   |
